# Supplementary material
Source: PubMed Central journal article supplement (PMC6629263)
Supplement: NIHMS1529772-supplement-8.pdf [file NIHMS1529772-supplement-8.pdf]

# 1 Supplemental Tables

2 **Table S1. Related to Figures 1-7, and STAR Methods. Growth medium composition.**

| Abbreviation    | Medium composition                                                                                                                                                                                                                                                                                                                                                                                                                                                                                                                                                                                                                   |
|-----------------|--------------------------------------------------------------------------------------------------------------------------------------------------------------------------------------------------------------------------------------------------------------------------------------------------------------------------------------------------------------------------------------------------------------------------------------------------------------------------------------------------------------------------------------------------------------------------------------------------------------------------------------|
| CAB             | 0.5 g/l casamino acids, 144 g/l NaCl, 18 g/l MgCl <sub>2</sub> ·6H <sub>2</sub> O, 21 g/l MgSO <sub>4</sub> ·7H <sub>2</sub> O, 4.2 g/l KCl, 12 ml/l Tris·HCl (pH 7.5), 0.05 g/l EDTA, 0.008 g/l FeCl <sub>3</sub> , 0.0005 g/l ZnCl <sub>2</sub> , 0.0001 g/l CuCl <sub>2</sub> , 0.0001 g/l CoCl <sub>2</sub> , 0.0001 g/l H <sub>3</sub> BO <sub>3</sub> , 1.6 g/l MnCl <sub>2</sub>                                                                                                                                                                                                                                              |
| CYE             | 1% casitone, 0.5% yeast extract, 10 mM MOPS (pH 7.6), 4 mM MgSO <sub>4</sub>                                                                                                                                                                                                                                                                                                                                                                                                                                                                                                                                                         |
| DSMZ Medium 172 | 1 g/l yeast extract, 1g/l tryptone, 24.7 g/l NaCl, 0.7 g/l KCl, 6.3 g/l MgSO <sub>4</sub> ·7H <sub>2</sub> O, 4.6 g/l MgCl <sub>2</sub> ·6H <sub>2</sub> O, 1.2 g/l CaCl <sub>2</sub> ·2H <sub>2</sub> O, 0.2 g/l NaHCO <sub>3</sub>                                                                                                                                                                                                                                                                                                                                                                                                 |
| GMM             | 2 g/l tryptone peptone, 1 g/l yeast extract, 0.4 g/l D-glucose, 0.5 g/l L-cysteine, 1 g/l cellobiose, 1 g/l maltose, 1 g/l fructose, 5 g/l meat extract, 100 mM KH <sub>2</sub> PO <sub>4</sub> , 0.008 mM MgSO <sub>4</sub> ·7H <sub>2</sub> O, 4.8 mM NaHCO <sub>3</sub> , 1.37 mM NaCl, 8 mg/l CaCl <sub>2</sub> , 5.8 mM menadione (vitamin K), 1.44 mM FeSO <sub>4</sub> , 1 ml/l histidine hematin solution (200 mM stock solution), 2 ml Tween 80 (25% stock solution), 10 ml ATCC vitamin mix, 10 mL ATCC trace mineral mix, 30 mM acetic acid, 1 mM isovaleric acid, 8 mM propionic acid, 4 mM butyric acid, 4 mM resazurin |
| LB              | 10 g/l NaCl, 5 g/l yeast extract, 10 g/l tryptone                                                                                                                                                                                                                                                                                                                                                                                                                                                                                                                                                                                    |
| LBS             | 20 g/l NaCl, 5 g/l yeast extract, 10 g/l tryptone                                                                                                                                                                                                                                                                                                                                                                                                                                                                                                                                                                                    |
| M2G             | 0.87 g/l Na <sub>2</sub> HPO <sub>4</sub> , 0.54 g/l KH <sub>2</sub> PO <sub>4</sub> , 0.50 g/l NH <sub>4</sub> Cl, 0.2% glucose, 0.5 mM MgSO <sub>4</sub> , 0.5 mM CaCl <sub>2</sub> , 0.01 mM FeSO <sub>4</sub>                                                                                                                                                                                                                                                                                                                                                                                                                    |
| M9 salts        | 6 g/l Na <sub>2</sub> HPO <sub>4</sub> ·7H <sub>2</sub> O, 3 g/l KH <sub>2</sub> PO <sub>4</sub> , 0.5 g/l NaCl, 1 g NH <sub>4</sub> Cl, 2 mM MgSO <sub>4</sub> , 0.1 mM CaCl <sub>2</sub>                                                                                                                                                                                                                                                                                                                                                                                                                                           |
| M9acet          | 1x M9 salts, 0.2% acetate (sodium salt)                                                                                                                                                                                                                                                                                                                                                                                                                                                                                                                                                                                              |
| M9acetCAAT      | 1x M9 salts, 0.2% acetate, 0.1% casamino acids, 1 µg/ml thiamine                                                                                                                                                                                                                                                                                                                                                                                                                                                                                                                                                                     |
| M9αKG           | 1x M9 salts, 0.2% α-ketoglutarate (sodium salt)                                                                                                                                                                                                                                                                                                                                                                                                                                                                                                                                                                                      |
| M9αKGCAAT       | 1x M9 salts, 0.2% α-ketoglutarate, 0.1% casamino acids, 1 µg/ml thiamine                                                                                                                                                                                                                                                                                                                                                                                                                                                                                                                                                             |
| M9CAAT          | 1x M9 salts, 0.1% casamino acids                                                                                                                                                                                                                                                                                                                                                                                                                                                                                                                                                                                                     |
| M9fuc           | 1x M9 salts, 0.2% fucose                                                                                                                                                                                                                                                                                                                                                                                                                                                                                                                                                                                                             |
| M9fucCAAT       | 1x M9 salts, 0.2% fucose, 0.1% casamino acids, 1 µg/ml thiamine                                                                                                                                                                                                                                                                                                                                                                                                                                                                                                                                                                      |
| M9fum           | 1x M9 salts, 0.2% fumarate (disodium salt)                                                                                                                                                                                                                                                                                                                                                                                                                                                                                                                                                                                           |
| M9fumCAAT       | 1x M9 salts, 0.2% fumarate, 0.1% casamino acids, 1 µg/ml thiamine                                                                                                                                                                                                                                                                                                                                                                                                                                                                                                                                                                    |
| M9glcnac        | 1x M9 salts, 0.2% N-acetylglucosamine                                                                                                                                                                                                                                                                                                                                                                                                                                                                                                                                                                                                |

|                       |                                                                                             |
|-----------------------|---------------------------------------------------------------------------------------------|
| M9glcnacCAAT          | 1x M9 salts, 0.2% N-acetylglucosamine, 0.1% casamino acids, 1 µg/ml thiamine                |
| M9glu                 | 1x M9 salts, 0.2% glucose                                                                   |
| M9gluCAAT             | 1x M9 salts, 0.2% glucose, 0.1% casamino acids, 1 µg/ml thiamine                            |
| M9gluCAAT+LB          | 1x M9 salts, 0.2% glucose, 0.1% casamino acids, 1 µg/ml thiamine, 10 % LB                   |
| M9gly                 | 1x M9 salts, 0.2% glycerol                                                                  |
| M9glyCAAT             | 1x M9 salts, 0.2% glycerol, 0.1% casamino acids, 1 µg/ml thiamine                           |
| M9lact                | 1x M9 salts, 0.2% lactose                                                                   |
| M9lactCAAT            | 1x M9 salts, 0.2% lactose, 0.1% casamino acids, 1 µg/ml thiamine                            |
| M9Lala                | 1x M9 salts, 0.2% L-alanine                                                                 |
| M9LalaCAAT            | 1x M9 salts, 0.2% L-alanine, 0.1% casamino acids, 1 µg/ml thiamine                          |
| M9Lara                | 1x M9 salts, 0.2% L-arabinose                                                               |
| M9LaraCAAT            | 1x M9 salts, 0.2% L-arabinose, 0.1% casamino acids, 1 µg/ml thiamine                        |
| M9mala                | 1x M9 salts, 0.2% malate (sodium salt)                                                      |
| M9malaCAAT            | 1x M9 salts, 0.2% malate, 0.1% casamino acids, 1 µg/ml thiamine                             |
| M9malt                | 1x M9 salts, 0.2% maltose                                                                   |
| M9maltCAAT            | 1x M9 salts, 0.2% maltose, 0.1% casamino acids, 1 µg/ml thiamine                            |
| M9mann                | 1x M9 salts, 0.2% mannose                                                                   |
| M9mannCAAT            | 1x M9 salts, 0.2% mannose, 0.1% casamino acids, 1 µg/ml thiamine                            |
| M9pyr                 | 1x M9 salts, 0.2% pyruvate (sodium salt)                                                    |
| M9pyrCAAT             | 1x M9 salts, 0.2% pyruvate, 0.1% casamino acids, 1 µg/ml thiamine                           |
| M9sorb                | 1x M9 salts, 0.2% sorbitol                                                                  |
| M9sorbCAAT            | 1x M9 salts, 0.2% sorbitol, 0.1% casamino acids, 1 µg/ml thiamine                           |
| M9succ                | 1x M9 salts, 0.2% succinate (disodium salt)                                                 |
| M9succCAAT            | 1x M9 salts, 0.2% succinate, 0.1% casamino acids, 1 µg/ml thiamine                          |
| M9treh                | 1x M9 salts, 0.2% trehalose                                                                 |
| M9trehCAAT            | 1x M9 salts, 0.2% trehalose, 0.1% casamino acids, 1 µg/ml thiamine                          |
| M9xyl                 | 1x M9 salts, 0.2% xylose                                                                    |
| M9xylCAAT             | 1x M9 salts, 0.2% xylose, 0.1% casamino acids, 1 µg/ml thiamine                             |
| Nutrient broth medium | 3 g/l beef extract, 5 g/l peptone                                                           |
| PYE                   | 2 g/l bacto-peptone, 1 g/l yeast extract, 1 mM MgSO <sub>4</sub> , 0.5 mM CaCl <sub>2</sub> |

|     |                                                                                                                                                                                                                                                                                                                                                                                                                                                                                          |
|-----|------------------------------------------------------------------------------------------------------------------------------------------------------------------------------------------------------------------------------------------------------------------------------------------------------------------------------------------------------------------------------------------------------------------------------------------------------------------------------------------|
| TYG | 10 g/l tryptone peptone, 5 g/l bacto yeast extract, 2 g/l D-glucose, 500 mg L-cysteine, 1 ml vitamin K solution (1 mg/ml stock solution), 1 ml/l 0.8% CaCl <sub>2</sub> , 1 ml FeSO <sub>4</sub> solution (0.4 mg/ml stock solution), 1 ml/l histidine hematin solution (200 mM stock solution), 4 mL resazurin solution (0.25 g/ml stock solution), 100mM potassium phosphate buffer (pH 7.2), 20 mg/l MgSO <sub>4</sub> ·7H <sub>2</sub> O, 400 mg/l NaHCO <sub>3</sub> , 80 mg/l NaCl |
| YPC | 0.5 g/l yeast extract, 0.1 g/l peptone, 0.1 g/l casamino acids, 144 g/l NaCl, 18 g/l MgCl <sub>2</sub> ·6H <sub>2</sub> O, 21 g/l MgSO <sub>4</sub> ·7H <sub>2</sub> O, 4.2 g/l KCl, 12 ml/l Tris·HCl (pH 7.5)                                                                                                                                                                                                                                                                           |

3

4 **Table S2. Related to STAR Methods. Construction of strains and plasmids used in this study.**

5

6 **Table S3. Related to STAR Methods. Oligonucleotides used in this study.**

| Name | Sequence (5' to 3')                                                                 |
|------|-------------------------------------------------------------------------------------|
| SG1  | GGCAGCGGCAGCGGCAGCTCCAAGGGCGAGGAGGATAAC                                             |
| SG2  | TTATTAGGATCCGCCAGCACCTT                                                             |
| SG3  | CTGTACAAAGGTGCTGGCGGATCCTAATAATGTGTAGGCTGGAGCTGCTTC                                 |
| SG4  | CTCGCCCTTGGAGCTGCCGCTGCCGCTGCCATCGCTCAAGACGTGTAATGCTG                               |
| SG5  | AGTCGATGCAATTCGCCGCGGAATTGATTGAGAAGGTTTGCGGAACATCGGCAGCGGCAGCGG<br>CA               |
| SG6  | TTAATCAAATCACTCTGTTGTGCAGGTTGGCCTGCACGATTGTGGATTGCCATATGAATATCCT<br>CCTTAGTTCCTATTC |
| SG19 | CTGTACAAAGGTGCTGGCGGATCCTAATAAGTGTAGGCTGGAGCTGCTTCGA                                |
| SG20 | CTCGCCCTTGGAGCTGCCGCTGCCGCTGCCAATCGCTCAAGACGTGTAATGCTG                              |
| SG25 | CCATAAACTGCCAGGCATCAA                                                               |
| SG28 | ATGTTTGAACCAATGGAACCTTACC                                                           |
| SG41 | TTAAGAAAACAGCGTTCGCACC                                                              |
| SG36 | GTCATTGGTAAGTTCCATTGGTTCAAACATAATCGCTCAAGACGTGTAATGCTG                              |
| SG43 | TAAAAAACGGTGCGAACGCTGTTTTCTTAAGTGTAGGCTGGAGCTGCTTCGA                                |
| SG59 | GCACTTTTCCGCACAACCTTATC                                                             |
| SG60 | ACCCTTTTCAGACGGCGTG                                                                 |
| SG61 | ACCCAGGAAGGCACGCCGTCTGAAAAGGGTTAATTCTCATGTTTGACAGCTTATCACTG                         |
| SG62 | CGAATGAAGATAAGTTGTGCGGAAAAGTGCATTCCGGGGATCCGTCGACC                                  |

|       |                                                                               |
|-------|-------------------------------------------------------------------------------|
| SG291 | TGGGTGCAGGTGTTGCAGTTGACCAGGCTGGCCTGAGCGCTTCTGTAAACGGCAGCGGCAGCGG<br>CA        |
| SG292 | TTATACGTGGGGGTAAGATTGTAGACAAAATCACCGCCACGTAAAGGCAATTCCGGGGATCCG<br>TCGACC     |
| SG295 | GTTCTCAGGATCTGGCTTCCCAGGCGGAAGAAAGCTTCGTAGAAGCTGAGGGCAGCGGCAGCGG<br>CA        |
| SG296 | TTGCCGCCTTCTGCAACTCGAACTATTTTGGGGGAGTTATCAAGCCTTAATTCCGGGGATCCGT<br>CGACC     |
| WTG1  | ACGTGCTAGCGTGTAAGGCTGGAGCTGCTTC                                               |
| WTG2  | ACGTGCTAGCATGGGAATTAGCCATGGTCC                                                |
| WTG3  | CCATGGGTGCAGGTGTTGCAGTTGACCAGGCTGGCCTGAGCGCTTCTGTAAACGGTCCGCCACC<br>ATGGTGAGC |
| WTG4  | GCATTATACGTGGGGGTAAGATTGTAGACAAAATCACCGCCACGTAAAGGCTCCTGCAGCCCG<br>GGGGATCC   |
| WTG5  | TAATTAATATGCATGGTACCTCCAGTGACATGGTAGACGGGATTA                                 |
| WTG6  | TCCCCGGGCTGCAGCTAGCTCAGGCTGAAAATCTTCTCTCATCC                                  |
| YP3   | GTGTAGGCTGGAGCTGCTTC                                                          |
| YP4   | GCTGCCGCTGCCGCTGCCAA                                                          |
| YP5   | AGCGATTGGCAGCGGCAGCGGCAGCTCAAAAGGCGAAGAAGCTTTTACC                             |
| YP6   | TAGGAAGCTCGAAGCAGCTCCAGCCTACACTTATTTATACAATTCATCCATTCCATGAGT                  |

7  
8  
9

**Table S4. Related to Figures 1, 2, 3, 4, 5, S1, S2, S3, S4, S5 and S6. Raw data underlying figures.**
