# Supplementary material
Source: PubMed Central journal article supplement (PMC6629263)

**A**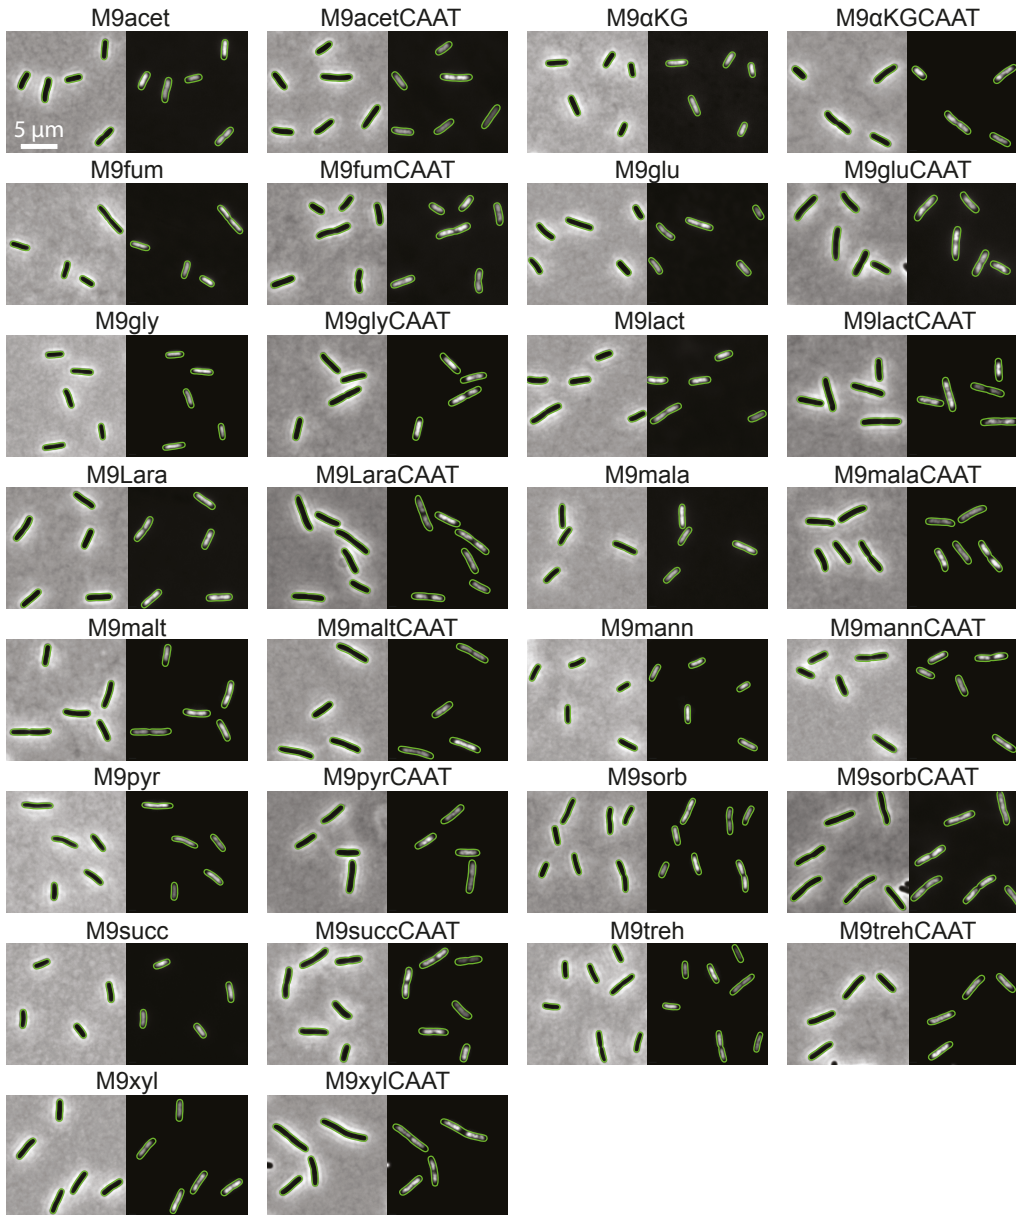**B**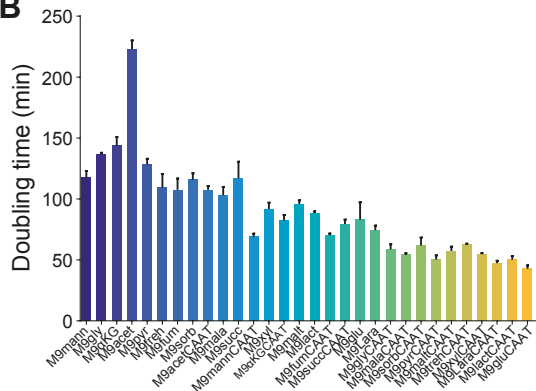**C**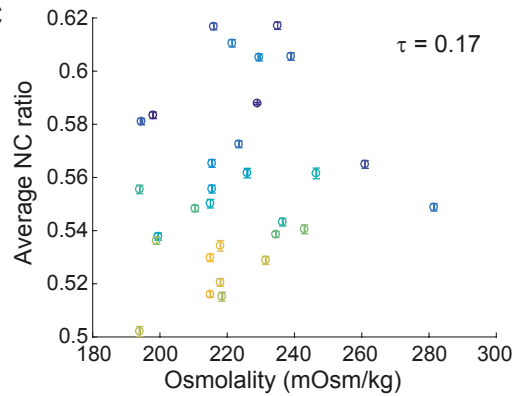

Supplement: NIHMS1529772-supplement-1.pdf [file NIHMS1529772-supplement-1.pdf]

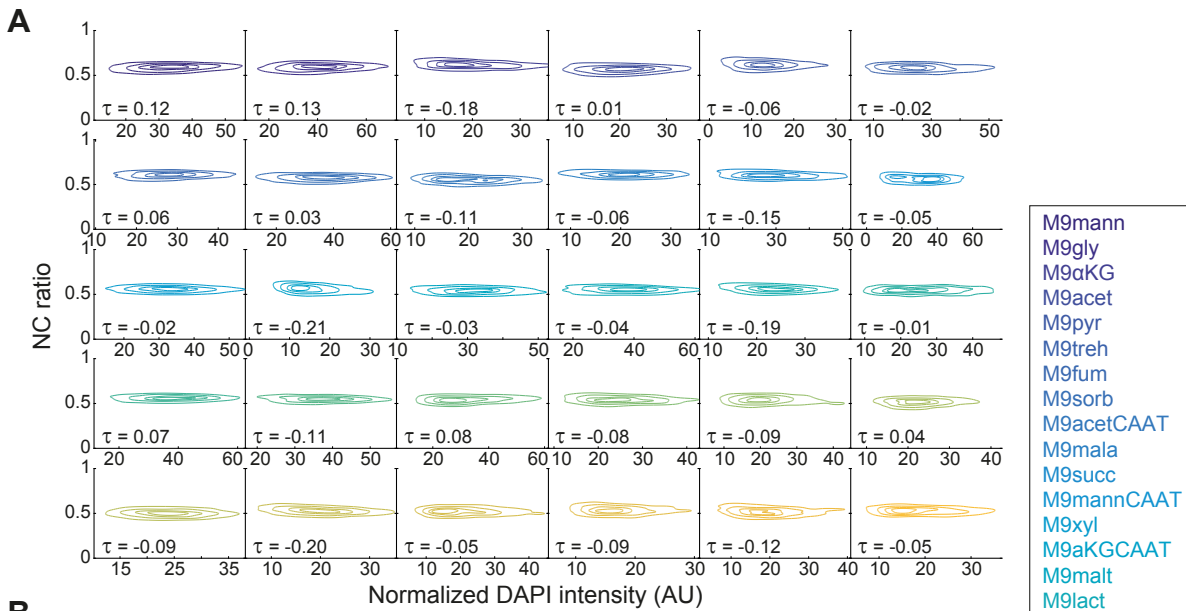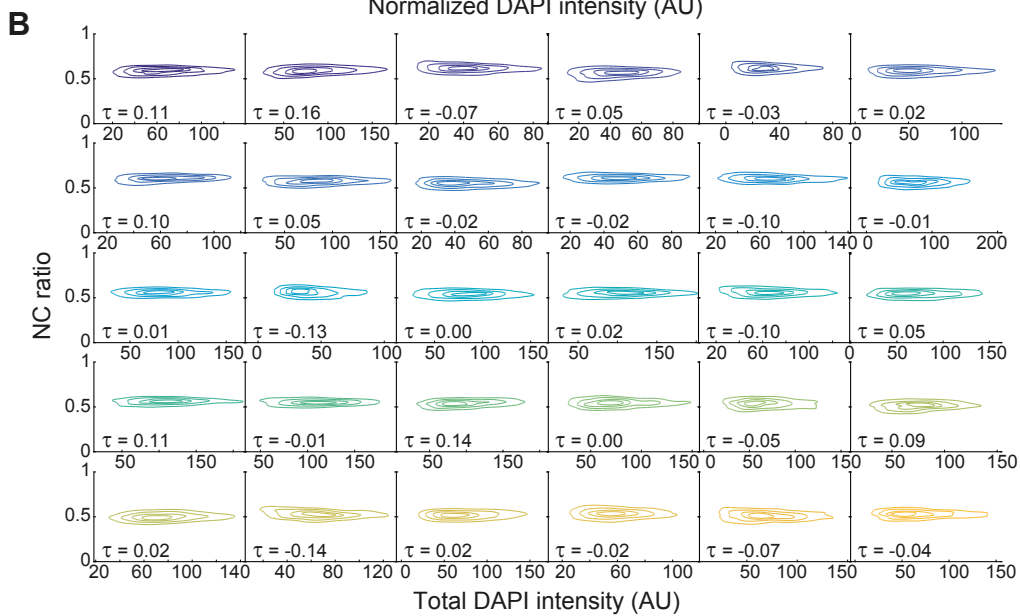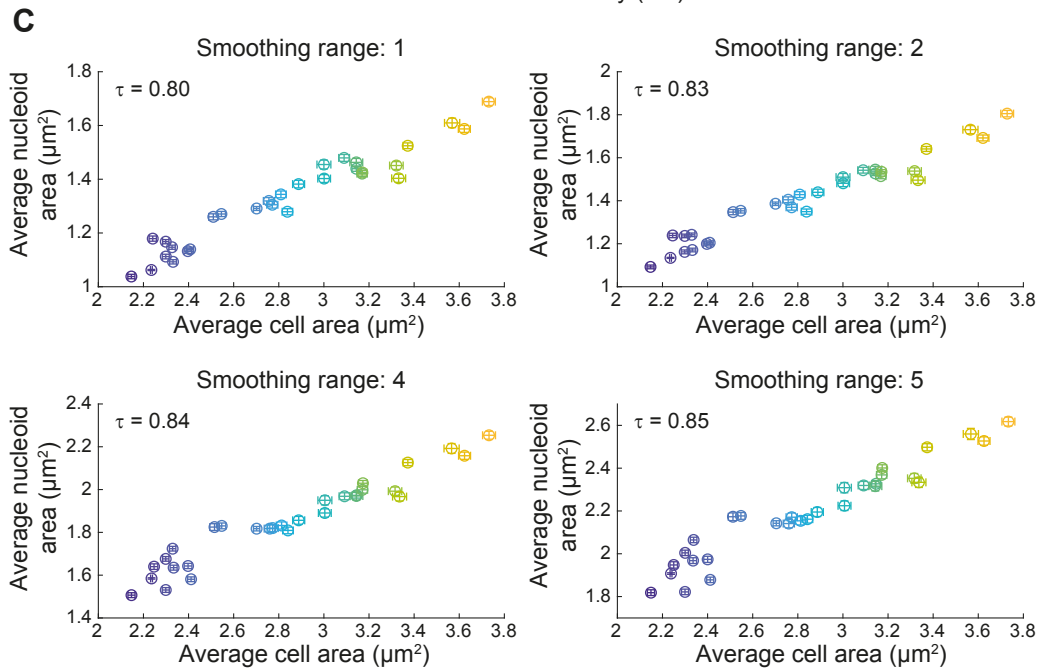

Supplement: NIHMS1529772-supplement-2.pdf [file NIHMS1529772-supplement-2.pdf]

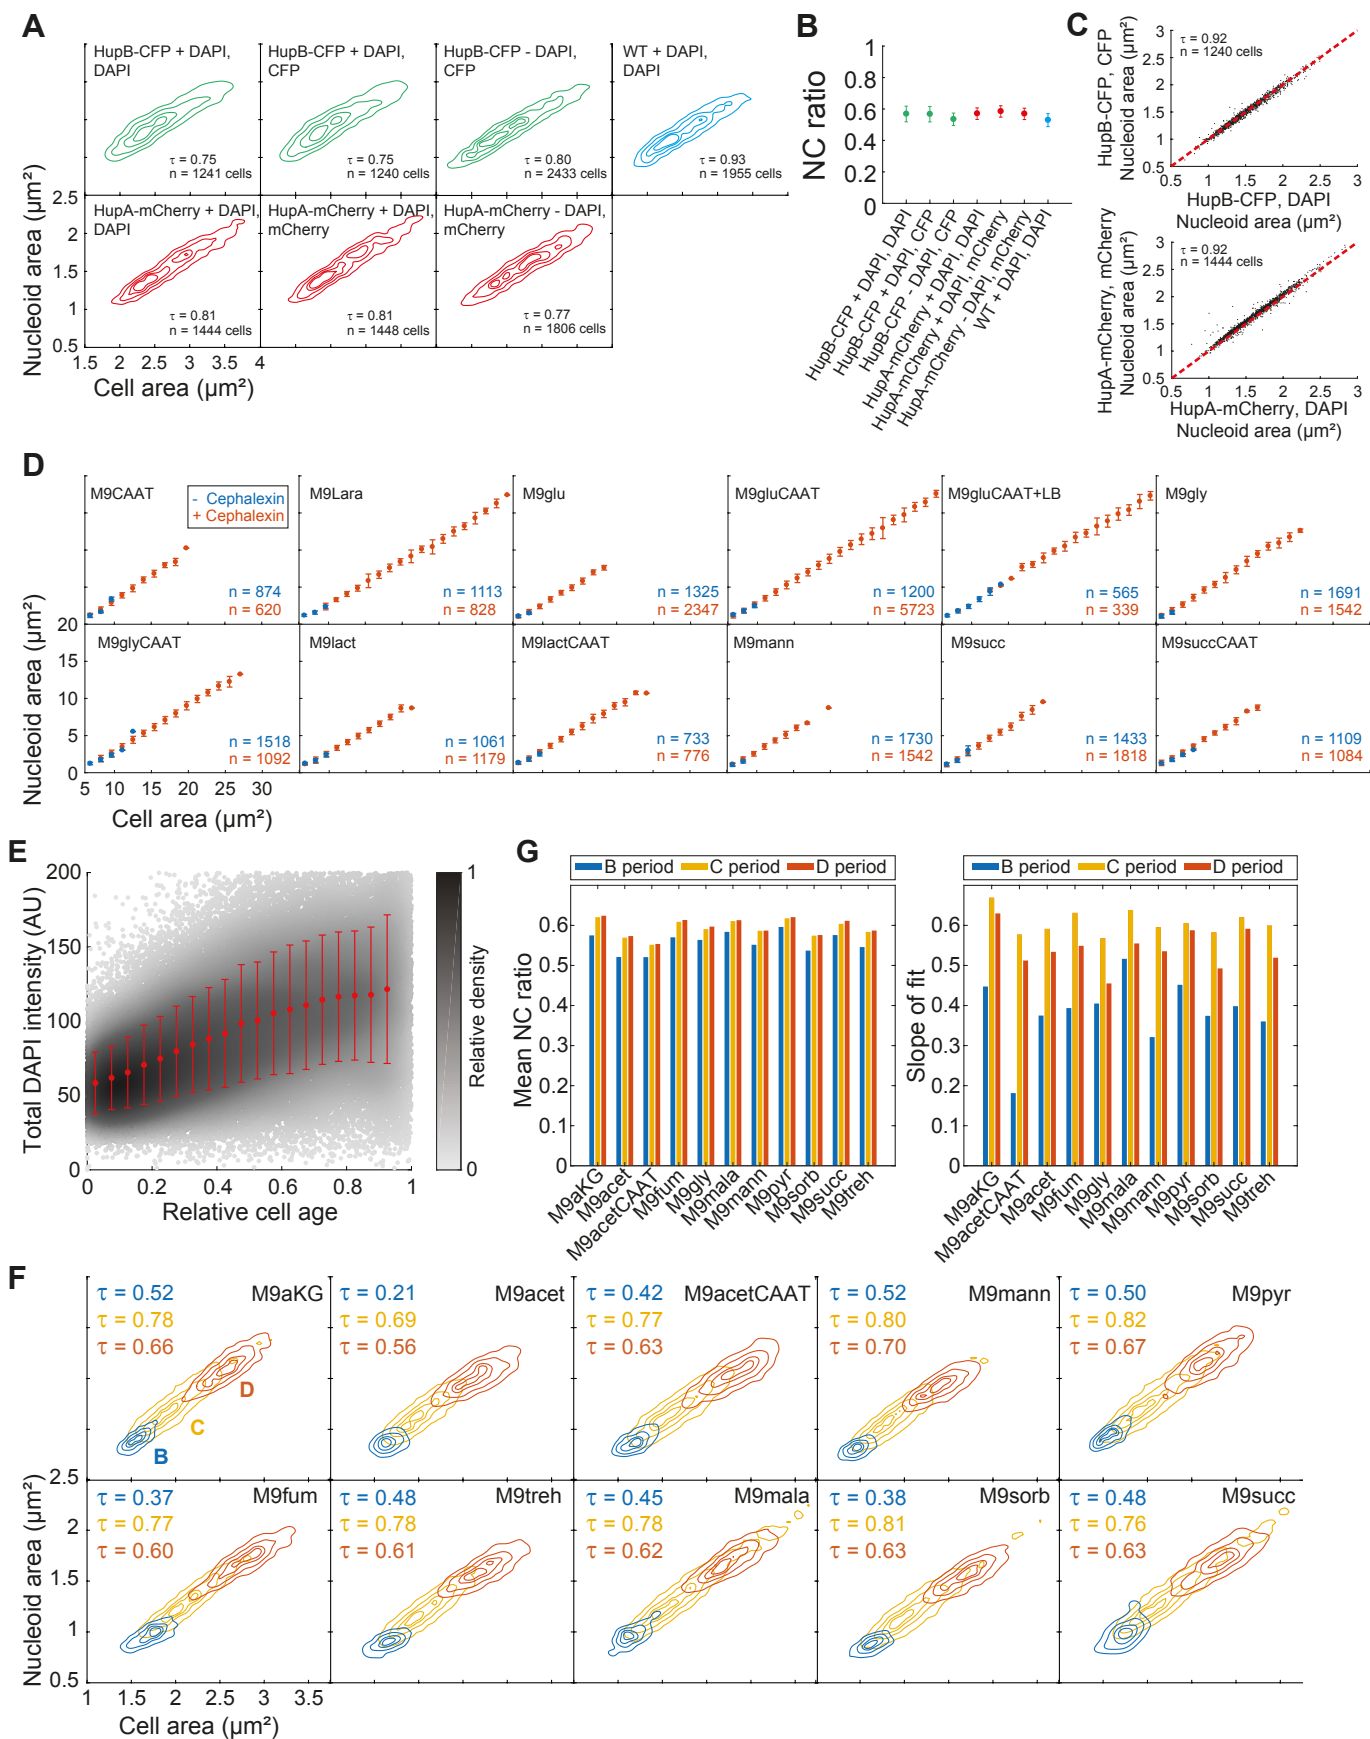

Supplement: NIHMS1529772-supplement-3.pdf [file NIHMS1529772-supplement-3.pdf]

**A**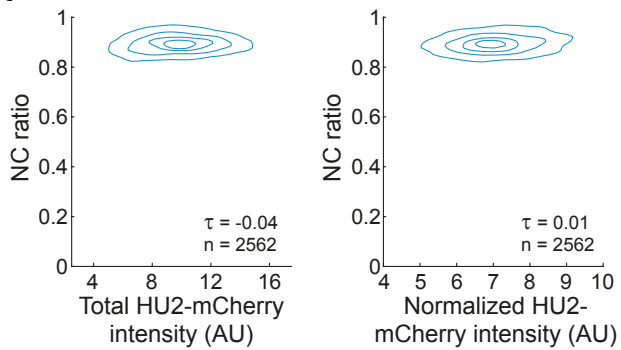**B**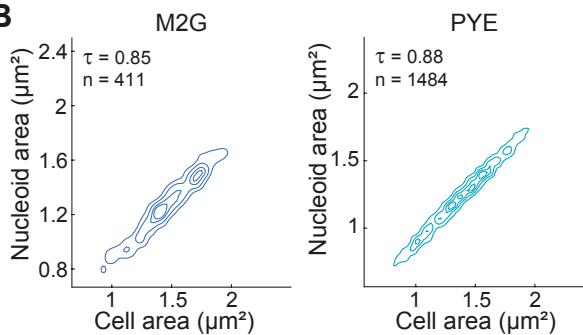**C**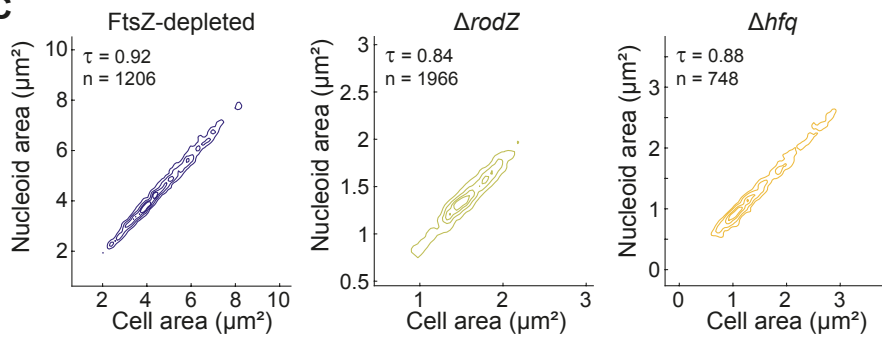**D**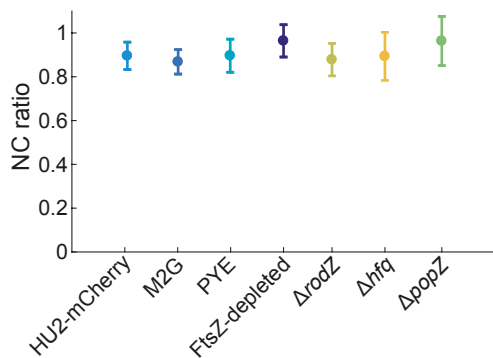**E**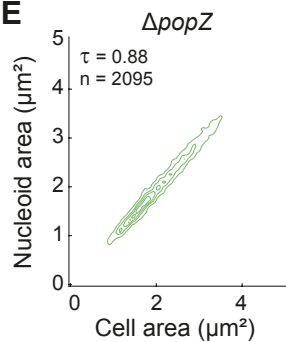

Supplement: NIHMS1529772-supplement-4.pdf [file NIHMS1529772-supplement-4.pdf]

**A**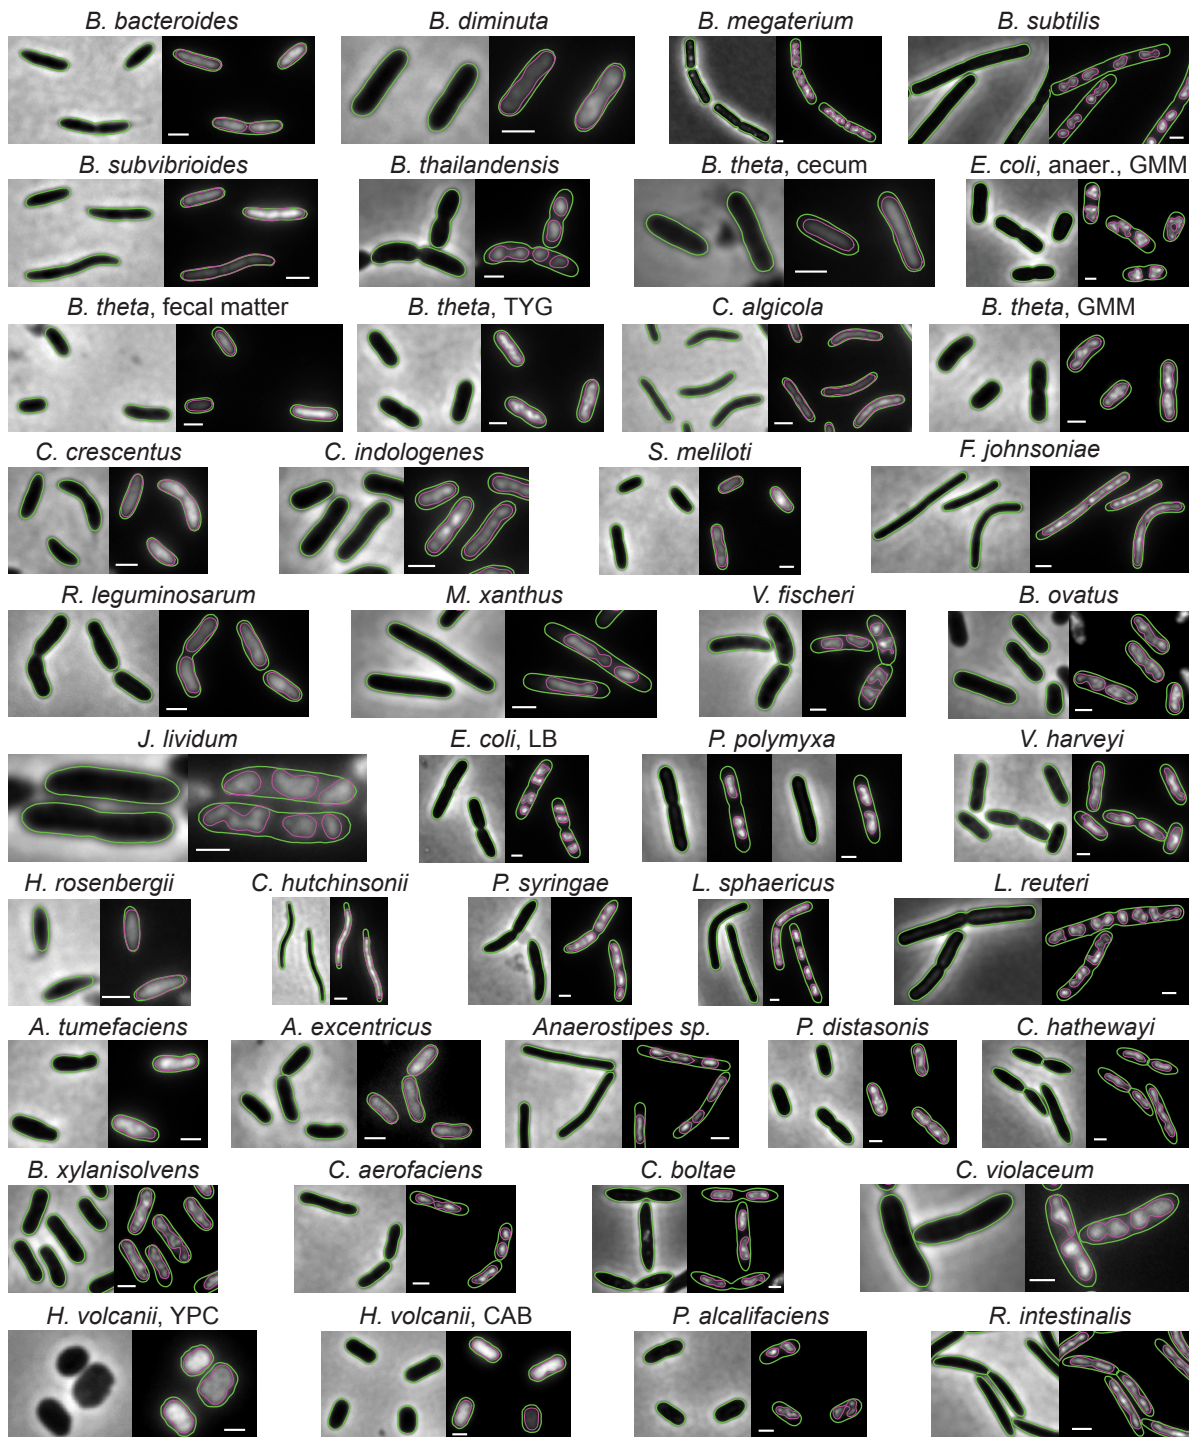Scale bars = 1  $\mu$ m**B**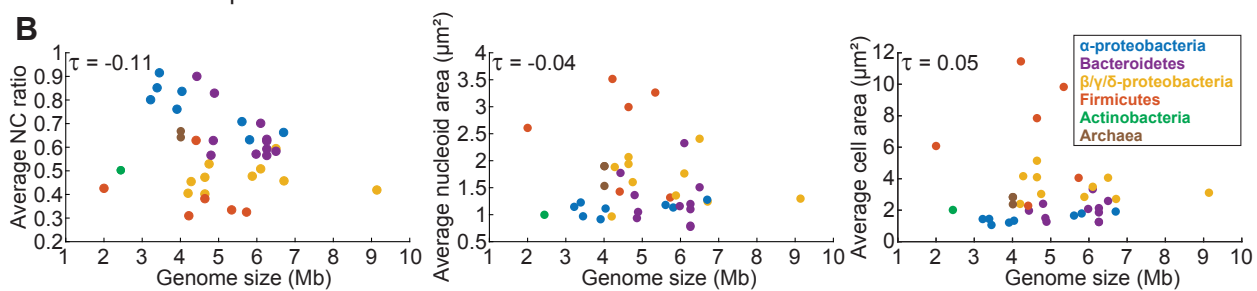

Supplement: NIHMS1529772-supplement-5.pdf [file NIHMS1529772-supplement-5.pdf]

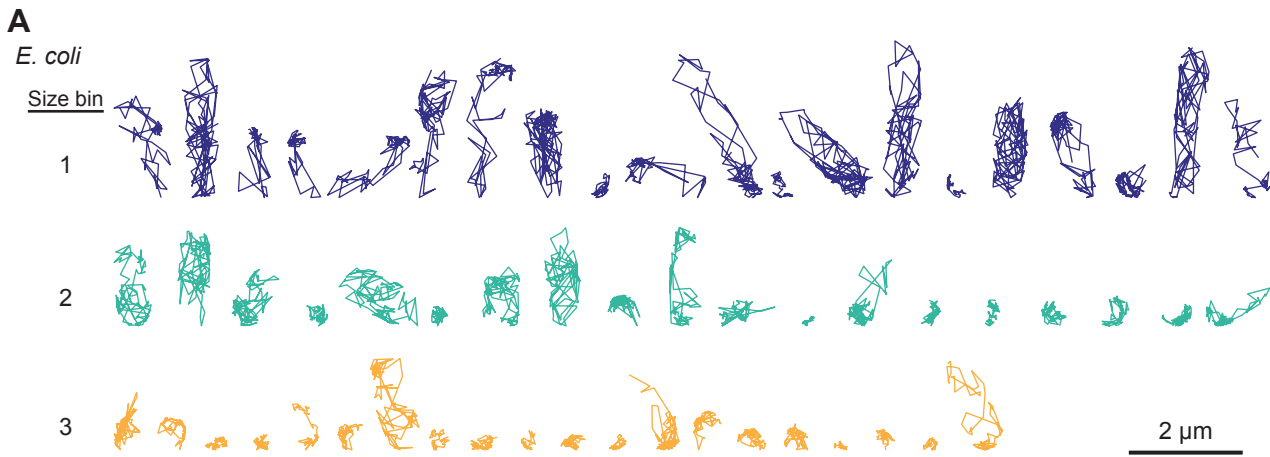

*C. crescentus*

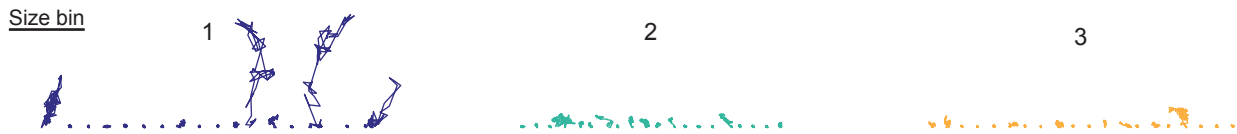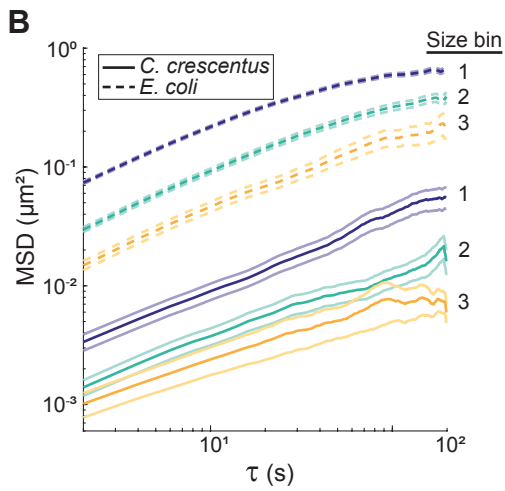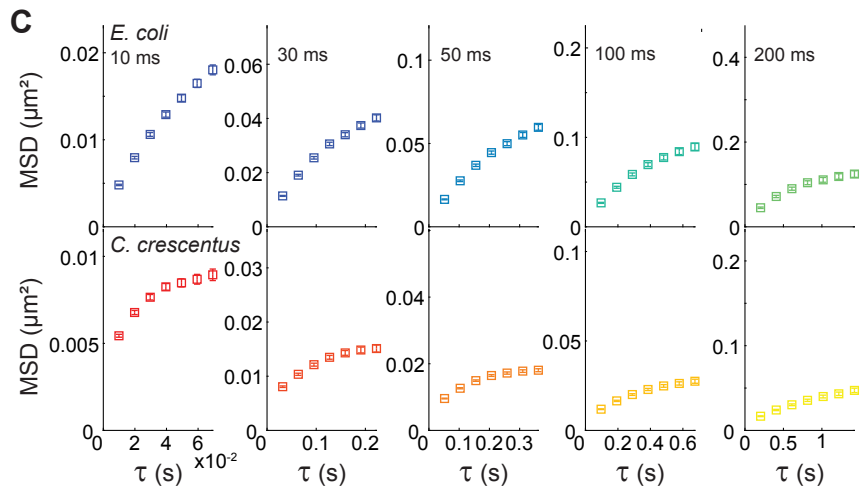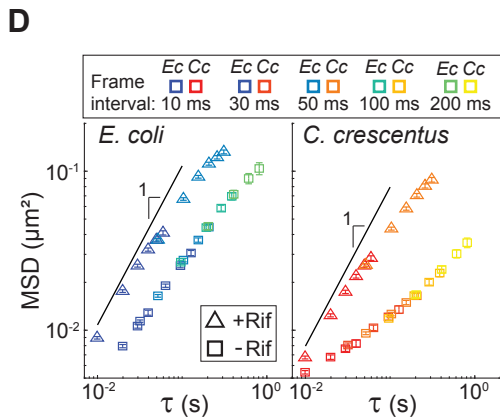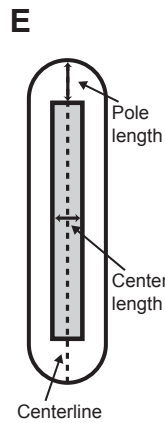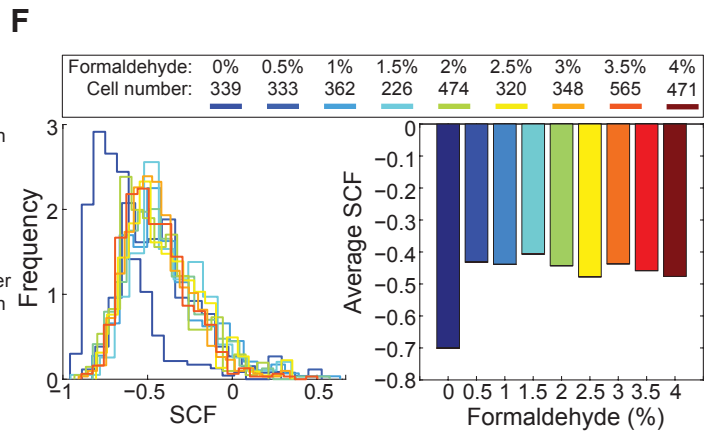

Supplement: NIHMS1529772-supplement-7.pdf [file NIHMS1529772-supplement-7.pdf]
